# Supplementary material for: Lignosulfonate-Based Polyurethane Adhesives
Source: MDPI journal article supplement (doi:10.3390/ma14227072), 2021-11-21
Supplement: s1 [file s1]

## Supplementary Materials

# Lignosulfonate-Based Polyurethane Adhesives

Sandra Magina <sup>1</sup>, Nuno Gama <sup>1</sup>, Luísa Carvalho <sup>2</sup>, Ana Barros-Timmons <sup>1</sup> and Dmitry V. Evtuguin <sup>1,\*</sup>

<sup>1</sup> CICECO and Department of Chemistry, University of Aveiro, 3810-193 Aveiro, Portugal;

smagina@ua.pt (S.M.); nuno.gama@ua.pt (N.G.); anabarros@ua.pt (A.B.-T.)

<sup>2</sup> LEPABE—Laboratory for Process, Environmental and Energy Engineering, Faculdade de Engenharia, University of Porto, 4200-465 Porto and DEMad—Department of Wood Engineering,

Instituto Politécnico de Viseu, 3504-510 Viseu, Portugal; lhcarvalho@estv.ipv.pt

\* Correspondence: dmitrye@ua.pt

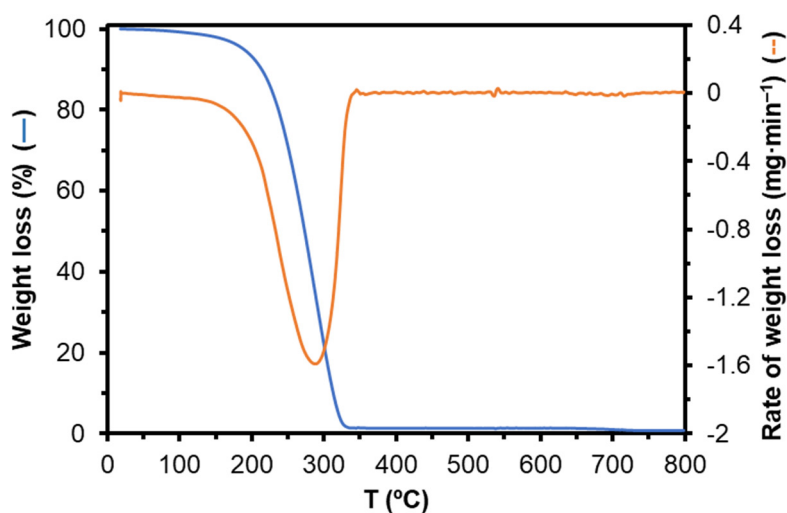

**Figure S1.** TGA curve of PEG<sub>200</sub>, under inert N<sub>2</sub> gas flow.
